# Supplementary material for: Synthesis of Degradable Polyolefins Bearing Disulfide Units via Metathesis Copolymerization
Source: MDPI journal article supplement (doi:10.3390/polym15143101), 2023-07-20
Supplement: s1 [file s1]

# Supplementary Materials

## Synthesis of Degradable Polyolefins Bearing Disulfide Units via Metathesis Copolymerization

Yu Xia <sup>1,2,†</sup>, Fulin Zhou <sup>2,†</sup>, Wenyan Hao <sup>1,\*</sup> and Shan Tang <sup>2,\*</sup>

<sup>1</sup> College of Chemistry and Chemical Engineering, Jiangxi Normal University, Nanchang 330022, China

<sup>2</sup> Frontiers Science Center for Transformative Molecules, School of Chemistry and Chemical Engineering, Shanghai Jiao Tong University, Shanghai 200240, China

\* Correspondence: wenyanhao@jxnu.edu.cn (W.H.); tang.shan@sjtu.edu.cn (S.T.)

† These authors contributed equally to this work.

### Contents

|                                |    |
|--------------------------------|----|
| 1. Copies of NMR spectra ..... | 2  |
| 2. Copies of TGA curves.....   | 11 |
| 3. Copies of DSC Trace .....   | 12 |
| 4. Copies of SEC Charts.....   | 13 |

## 1. Copies of NMR spectra

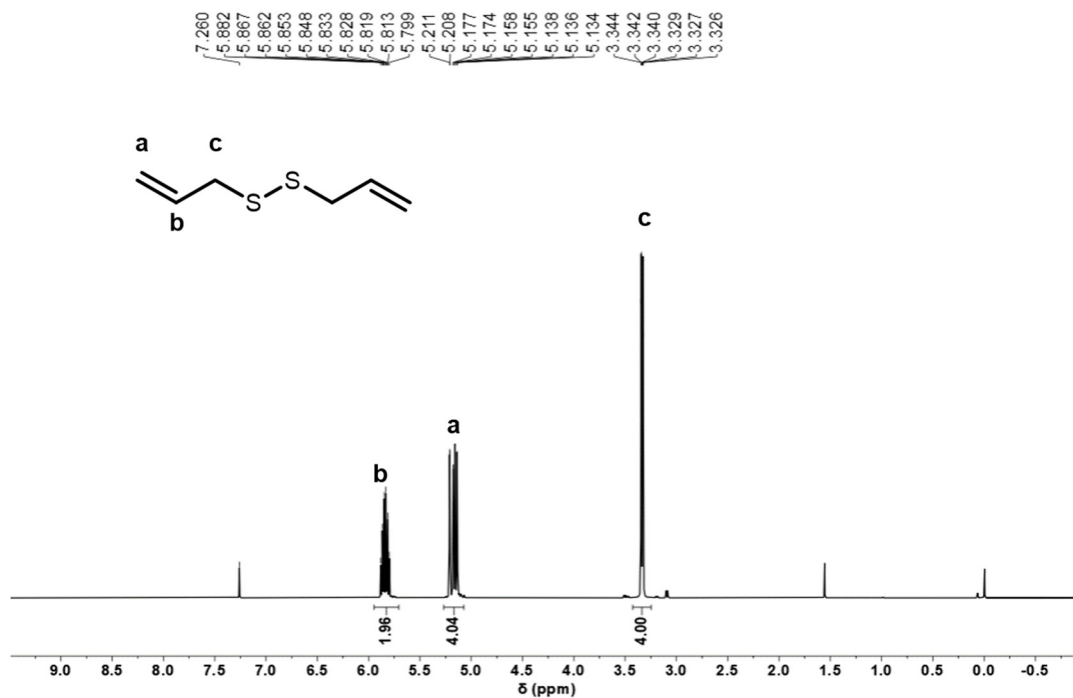

**Figure S1.** <sup>1</sup>H NMR spectrum of diallyl disulfide.

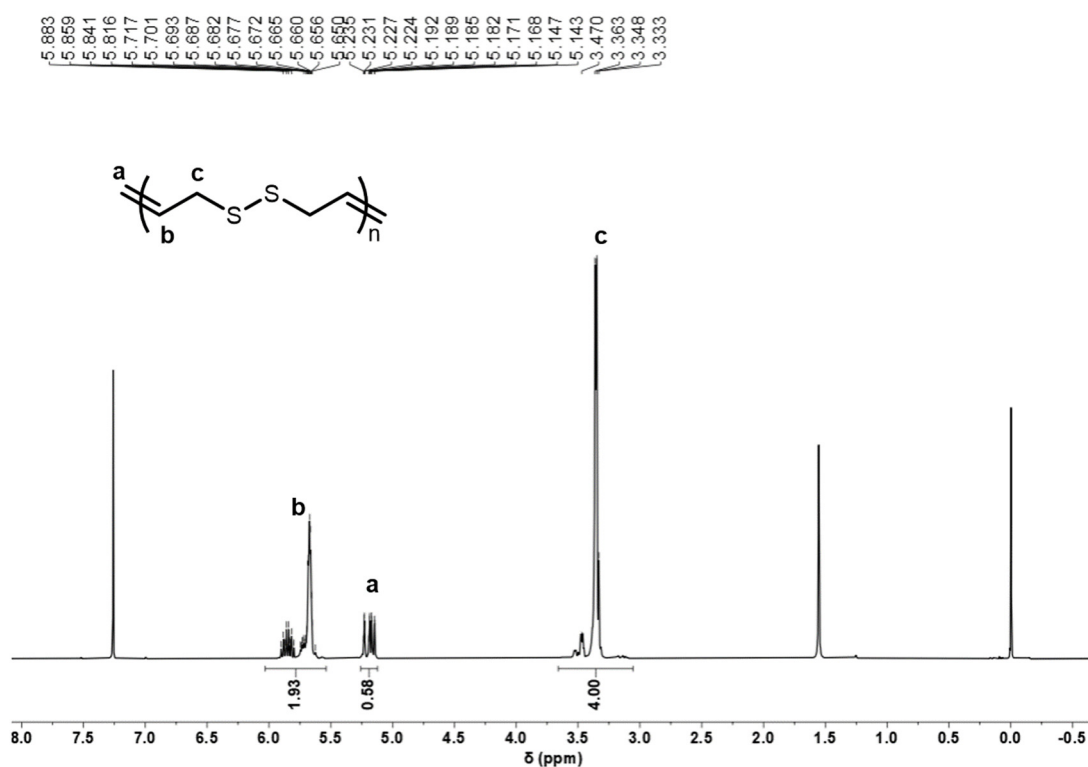

**Figure S2.** <sup>1</sup>H NMR spectrum of homopolymer of diallyl disulfide.

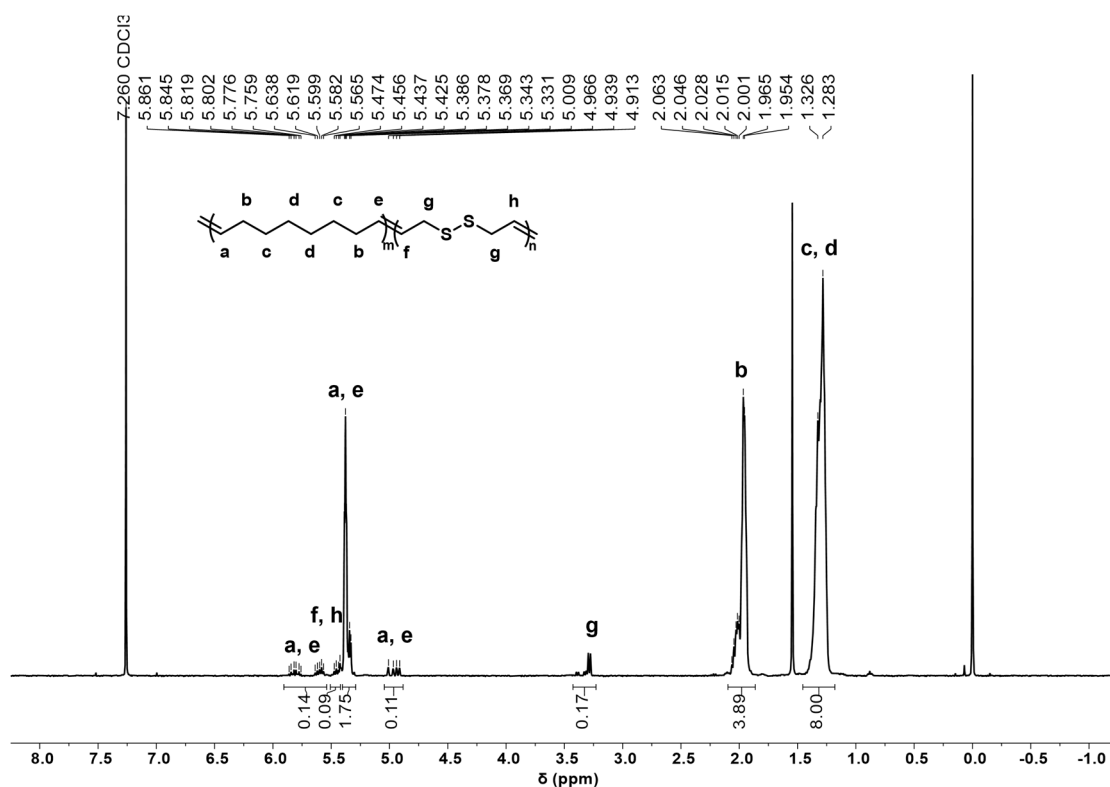

**Figure S3.** <sup>1</sup>H NMR spectrum of polymer obtained in Table 1, Entry 1.

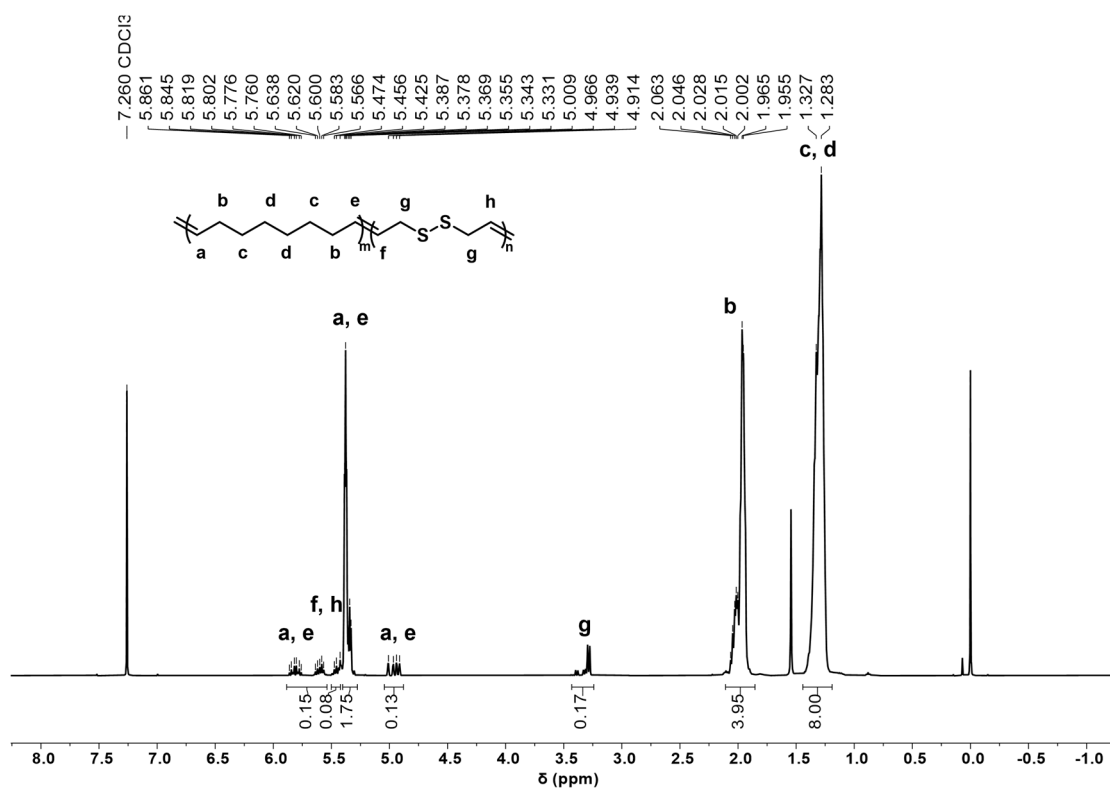

**Figure S4.** <sup>1</sup>H NMR spectrum of polymer obtained in Table 1, Entry 2.

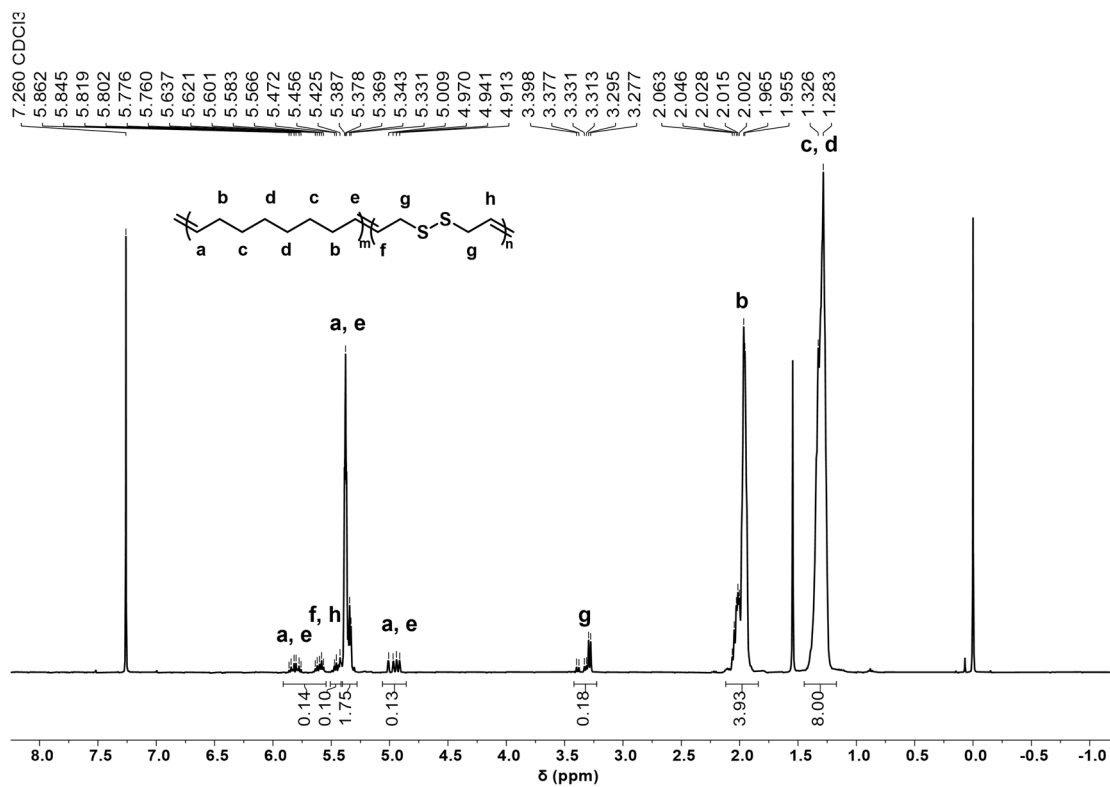

**Figure S5.** <sup>1</sup>H NMR spectrum of polymer obtained in Table 1, Entry 3.

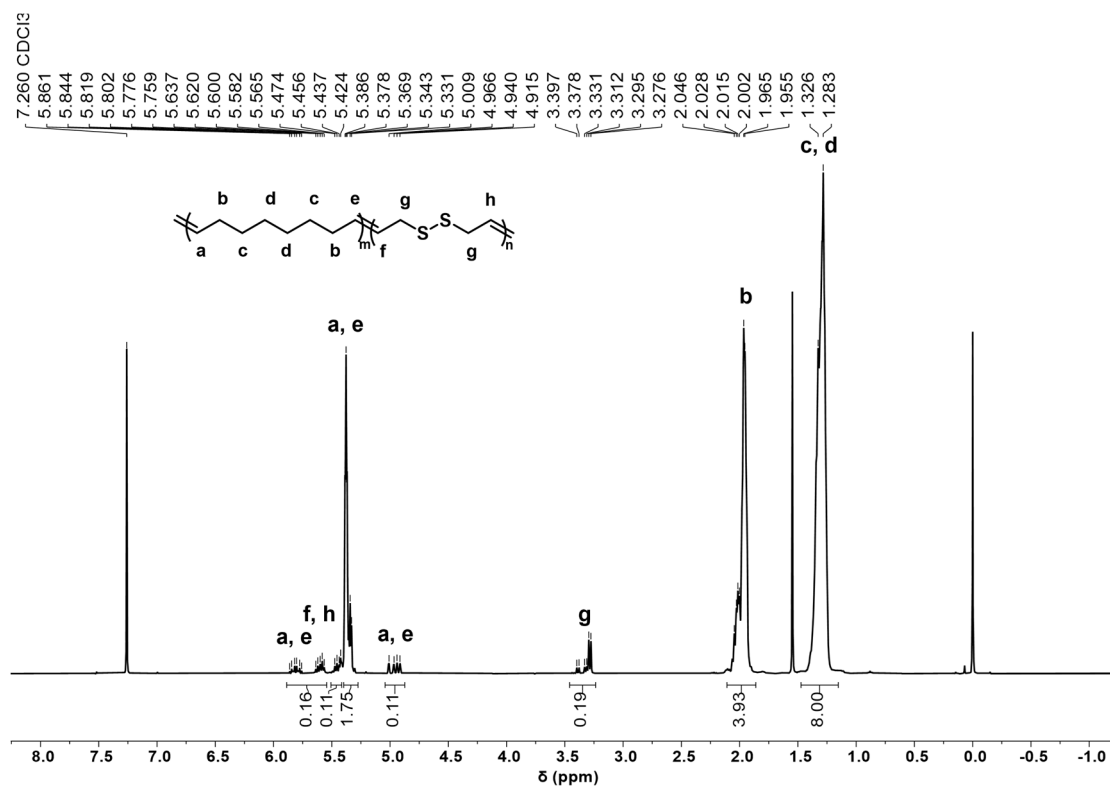

**Figure S6.** <sup>1</sup>H NMR spectrum of polymer obtained in Table 1, Entry 4.

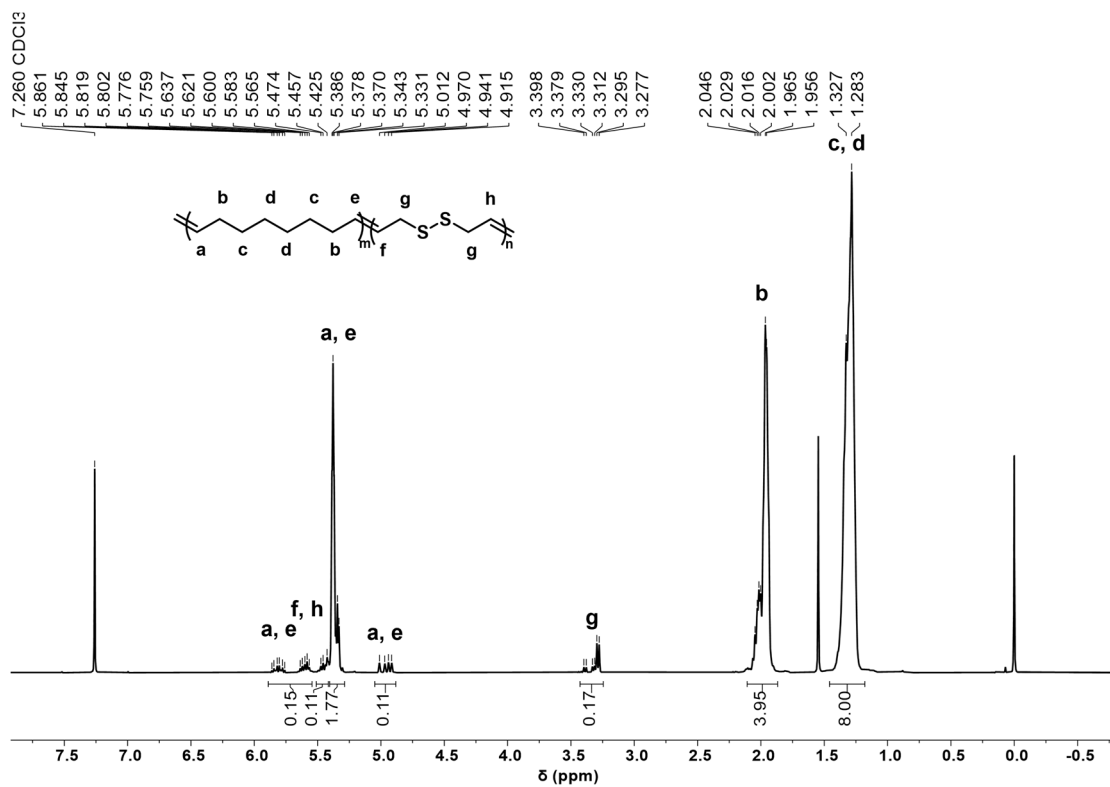

**Figure S7.** <sup>1</sup>H NMR spectrum of polymer obtained in Table 1, Entry 5.

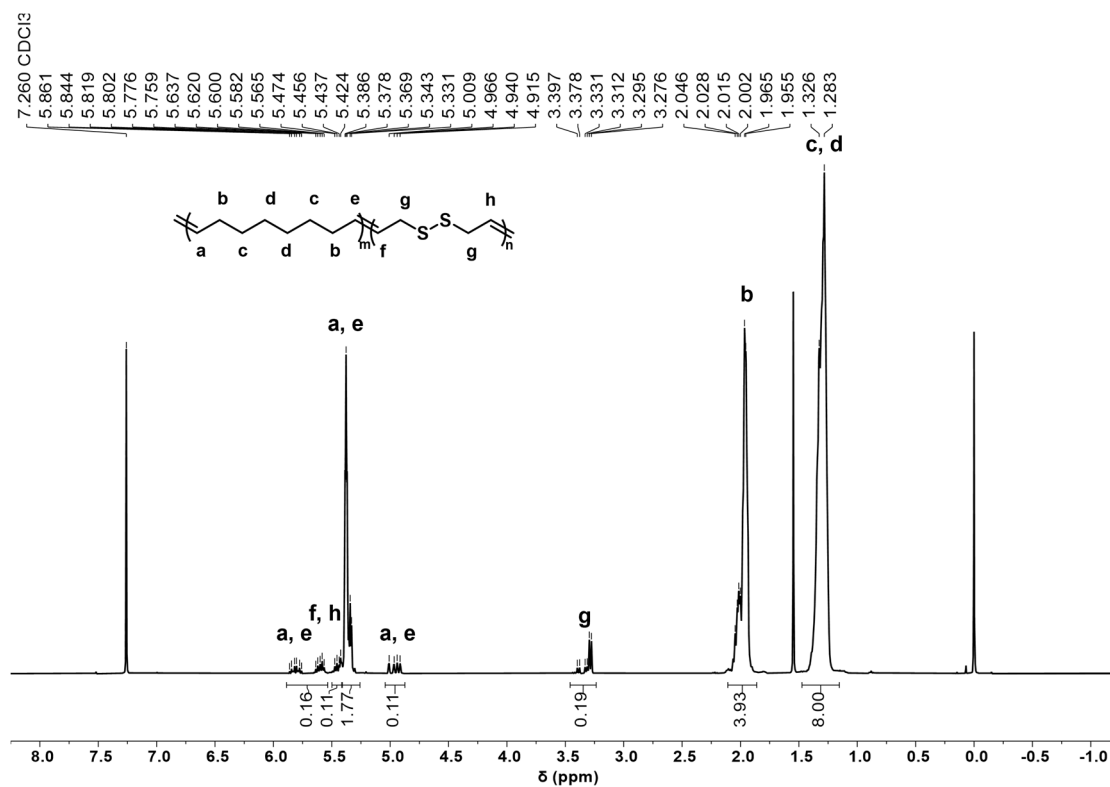

**Figure S8.** <sup>1</sup>H NMR spectrum of polymer obtained in Table 1, Entry 6.

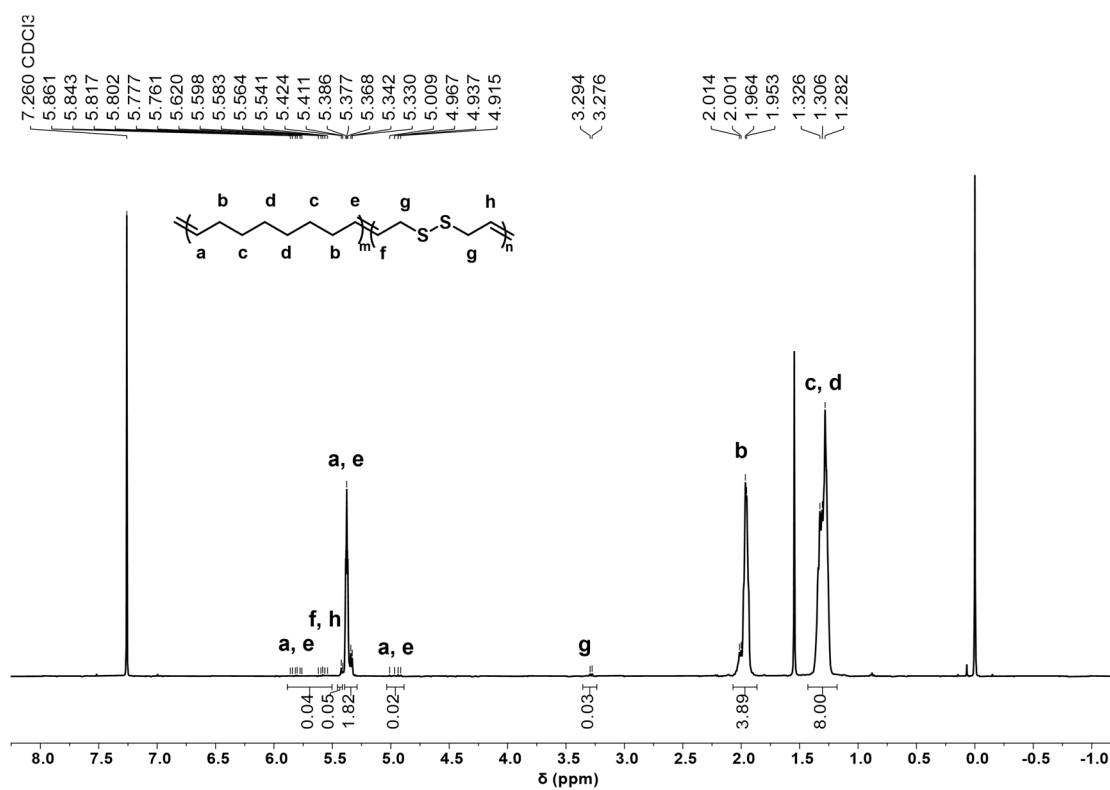

**Figure S9.**  $^1\text{H}$  NMR spectrum of polymer obtained in Table 1, Entry 7.

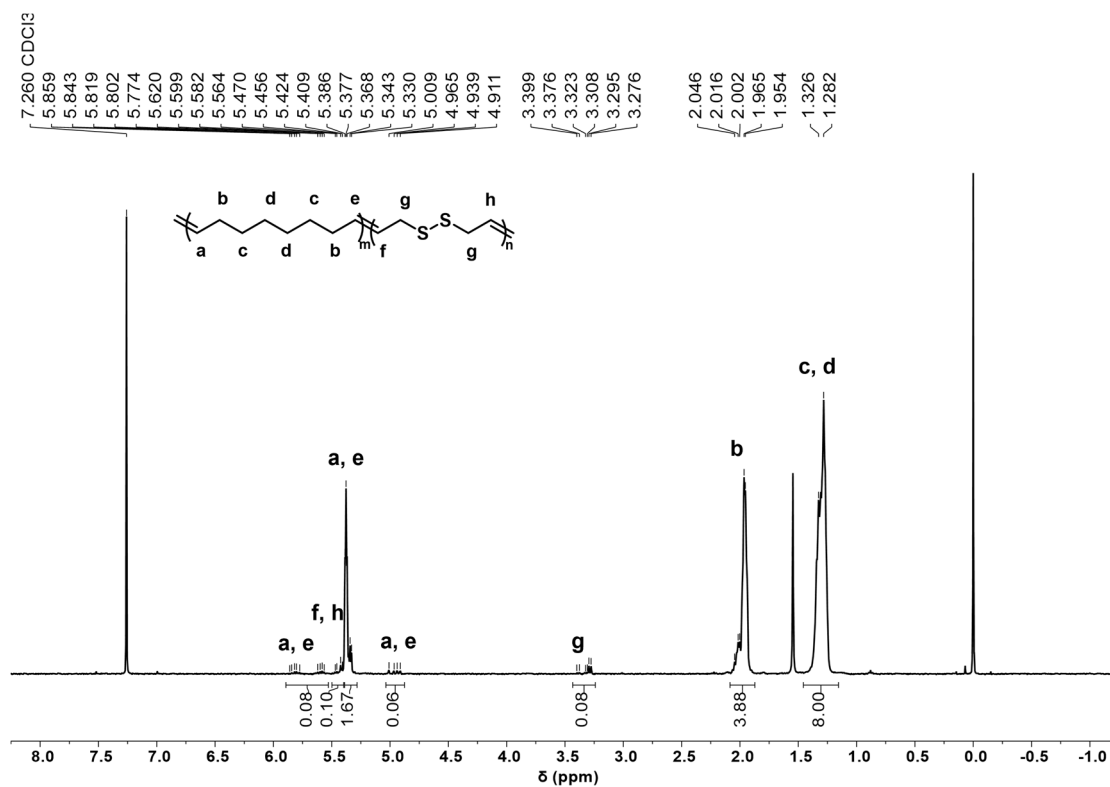

**Figure S10.**  $^1\text{H}$  NMR spectrum of polymer obtained in Table 1, Entry 8.

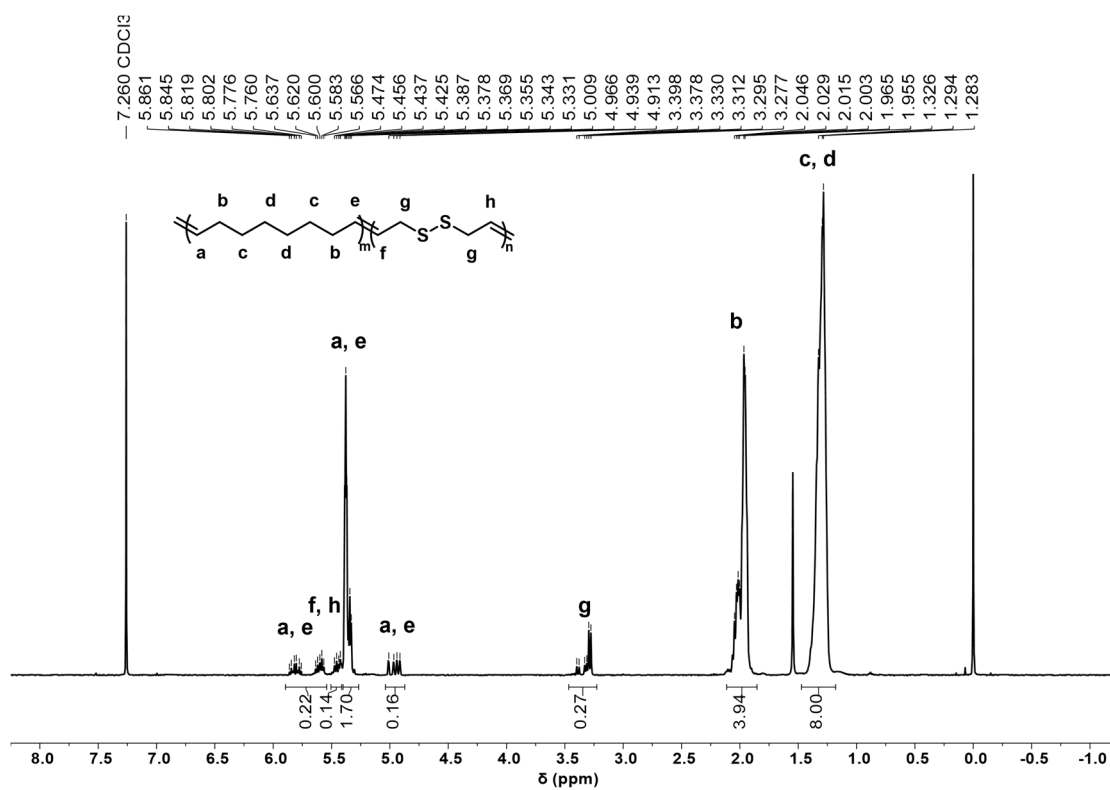

**Figure S11.**  $^1\text{H}$  NMR spectrum of polymer obtained in Table 1, Entry 9.

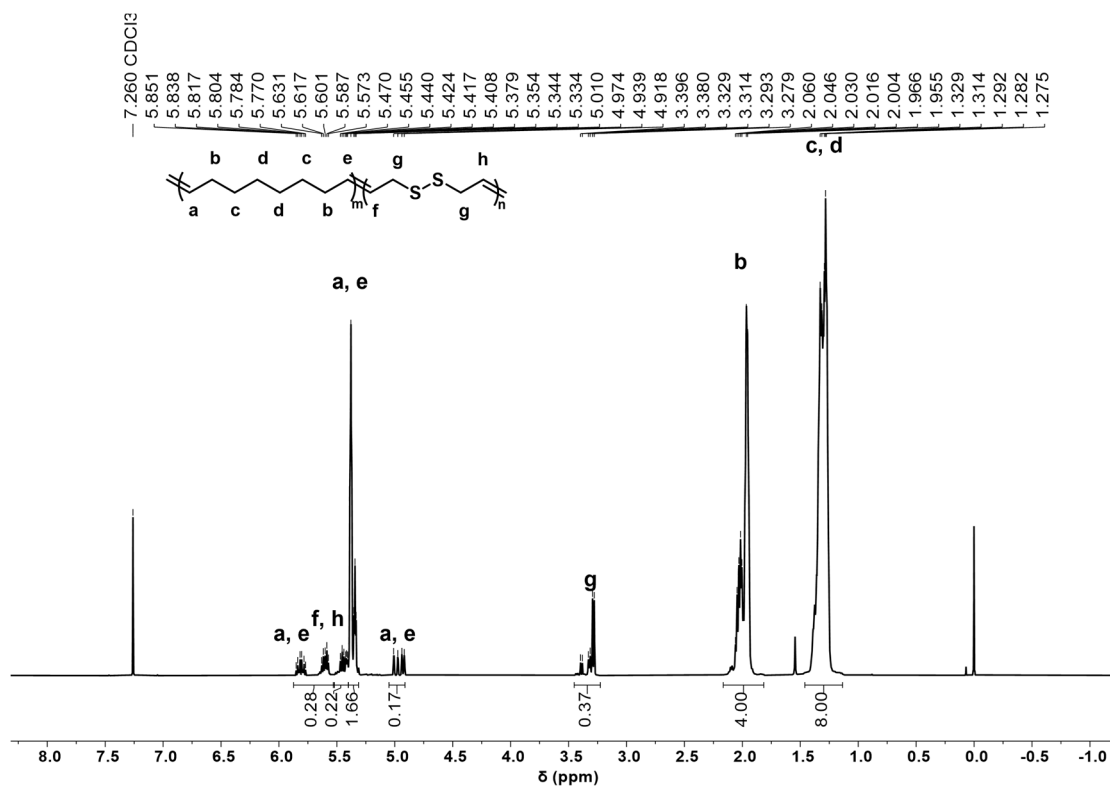

**Figure S12.**  $^1\text{H}$  NMR spectrum of polymer obtained in Table 1, Entry 10.

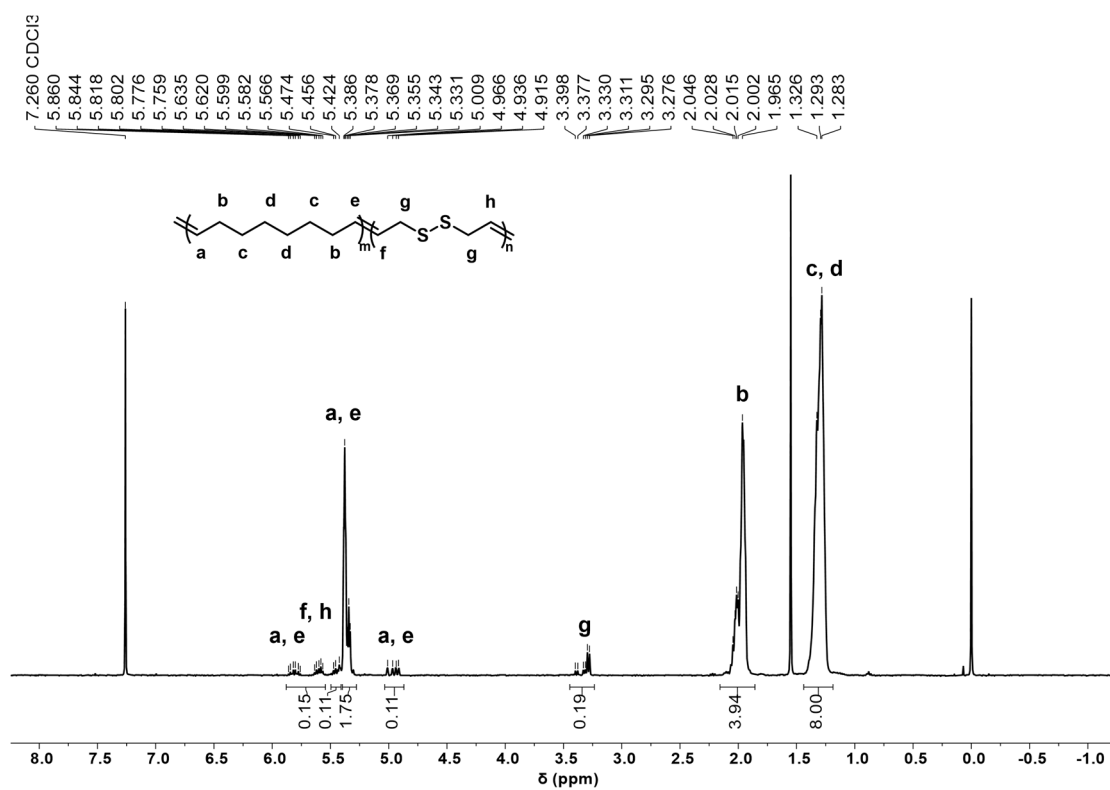

**Figure S13.** <sup>1</sup>H NMR spectrum of polymer obtained in Table 1, Entry 11.

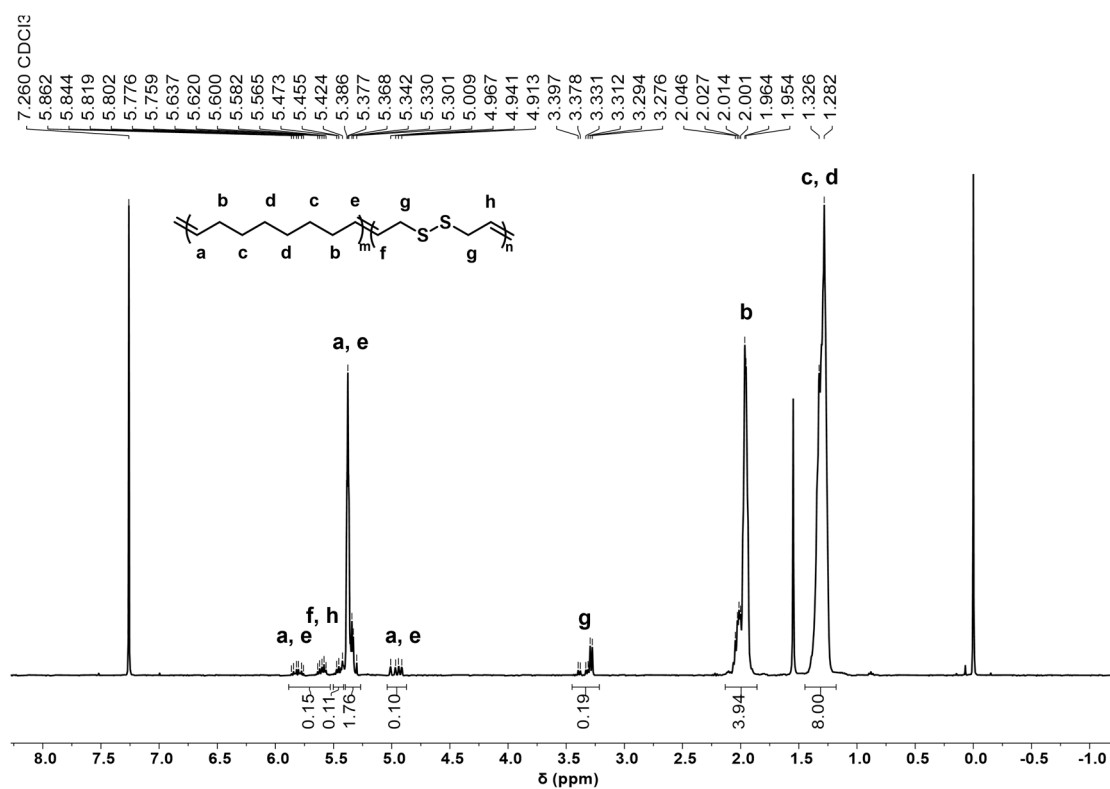

**Figure S14.** <sup>1</sup>H NMR spectrum of polymer obtained in Table 1, Entry 12.



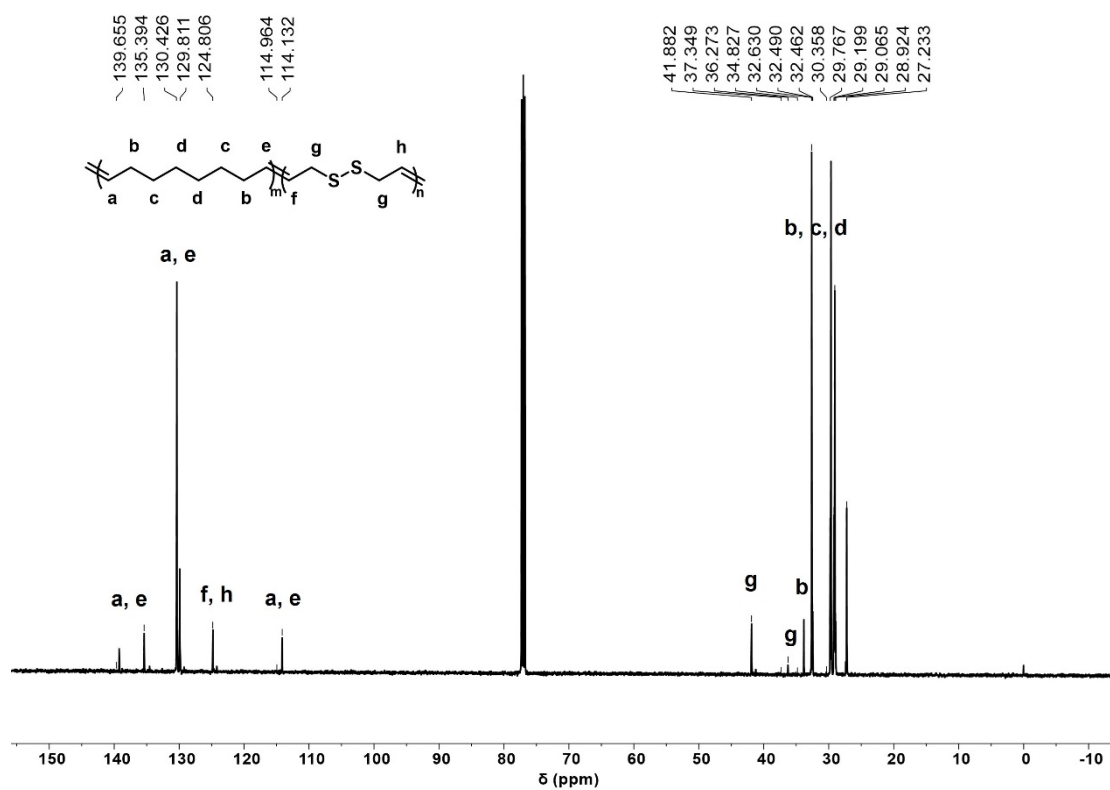

**Figure S15.**  $^{13}\text{C}$  NMR spectrum of polymer obtained in Table 1, Entry 10.

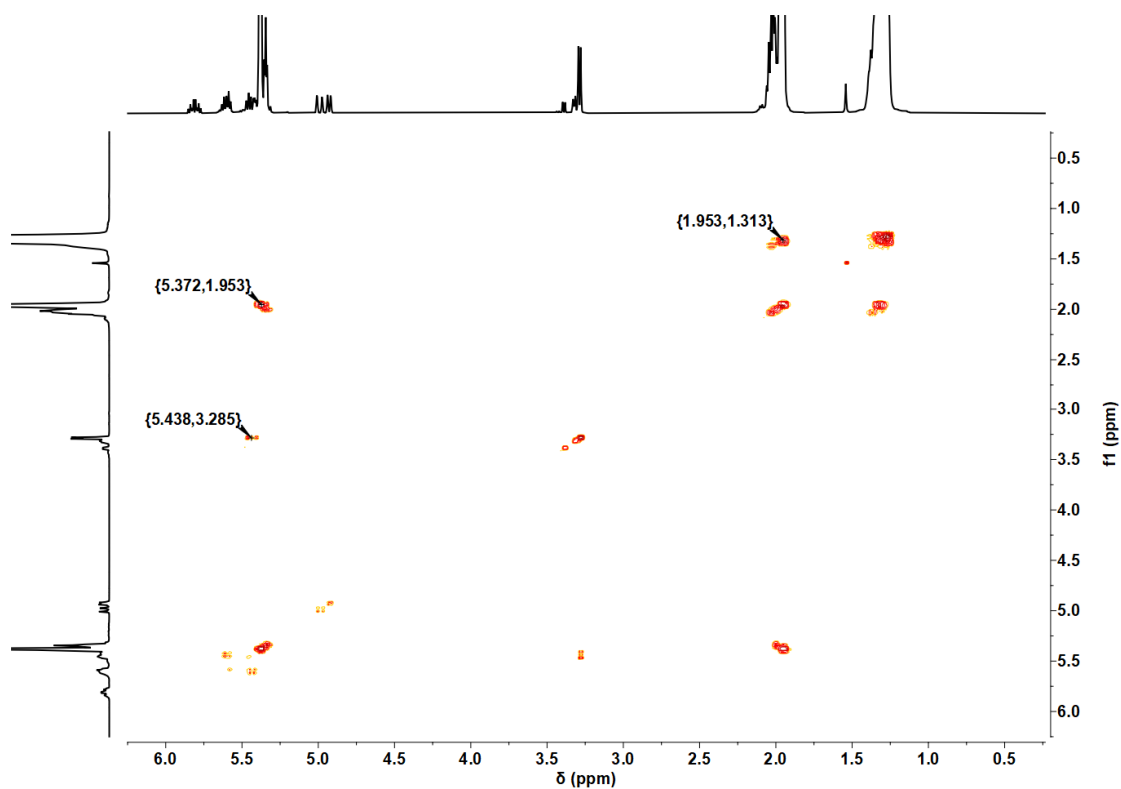

**Figure S16.** 2D  $^1\text{H}$ - $^1\text{H}$  COSY-NMR spectrum of polymer obtained in Table 1, Entry 10.

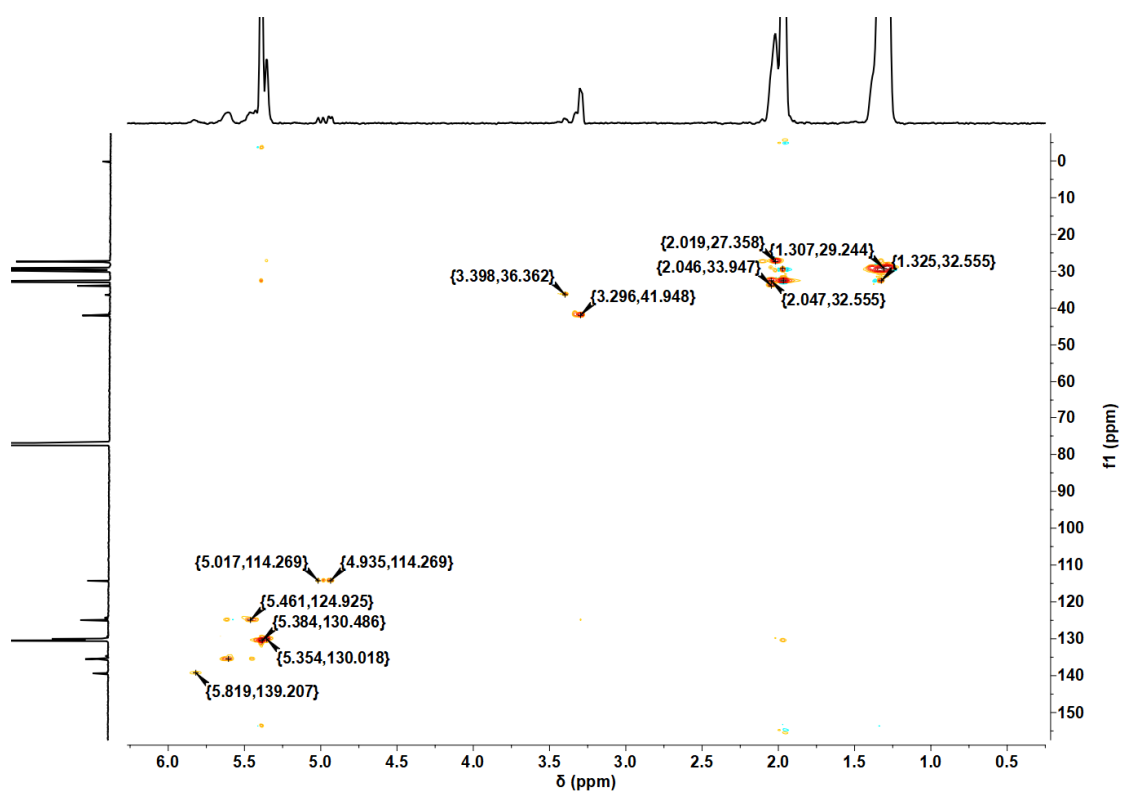

**Figure S17.** 2D  $^1\text{H}$ - $^{13}\text{C}$  HSQC NMR spectrum of polymer obtained in Table 1, Entry 10.

## 2. Copies of TGA curves

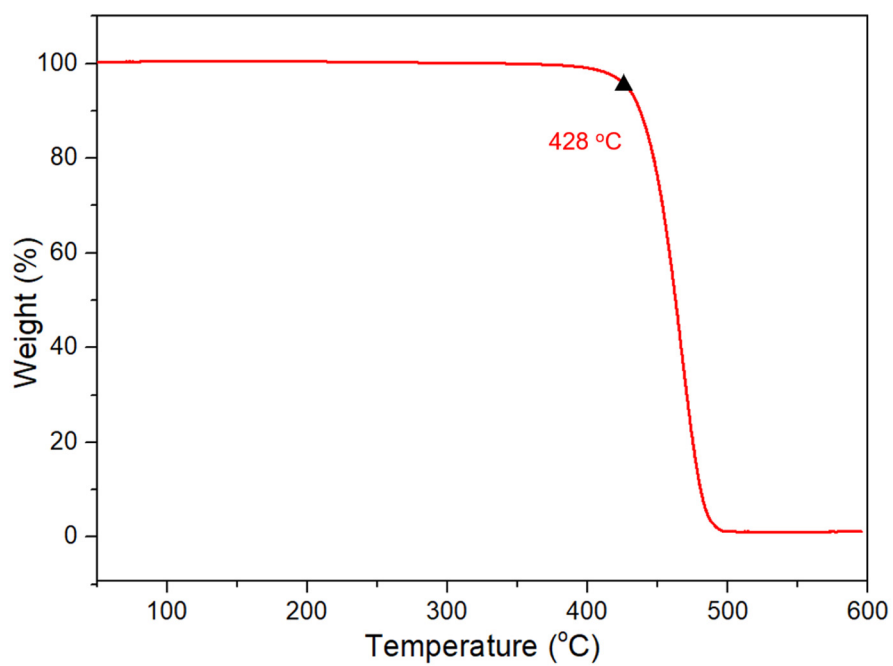

**Figure S18.** TGA curve of polymer obtained in Table 1, Entry 7.

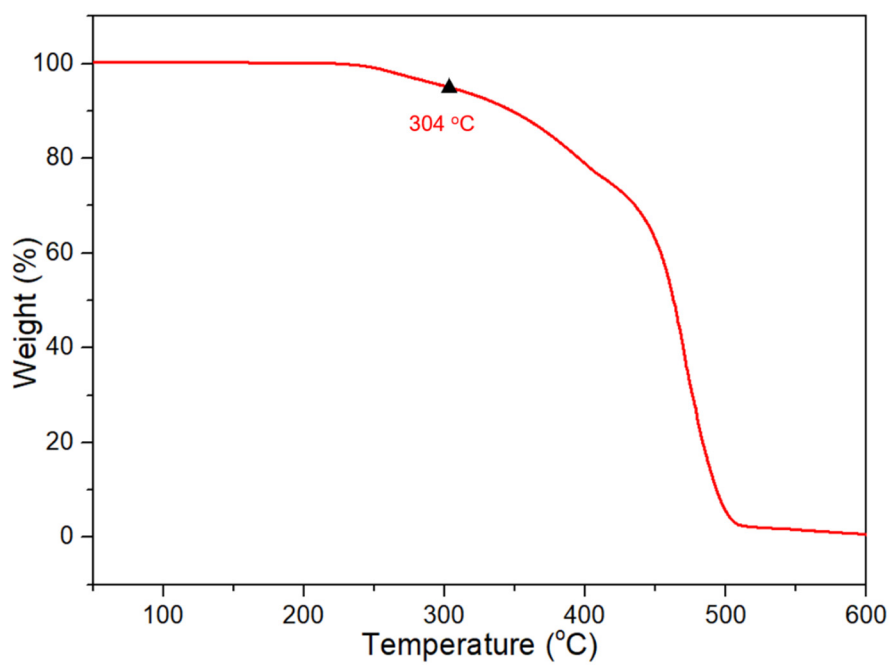

**Figure S19.** TGA curve of polymer obtained in Table 1, Entry 10.

### 3. Copies of DSC Trace

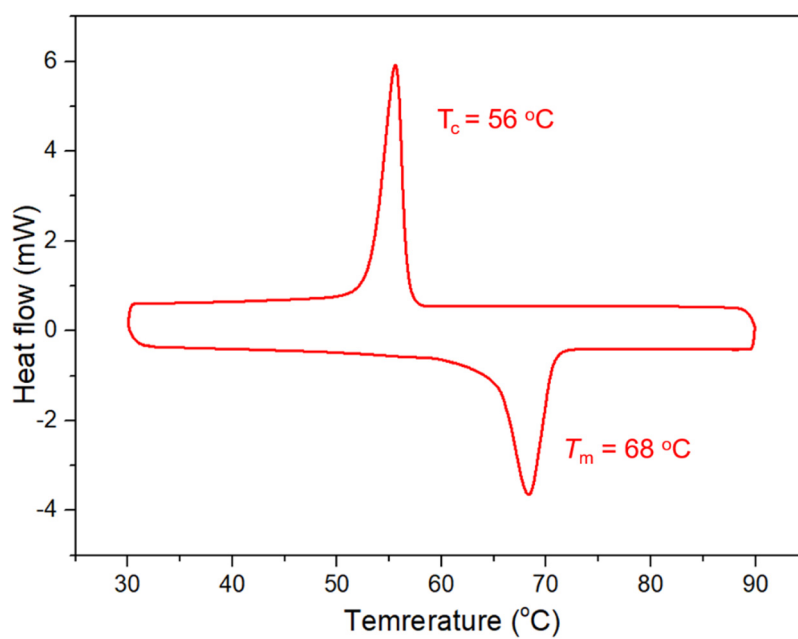

**Figure S20.** DSC trace of polymer obtained in Table 1, Entry 7.

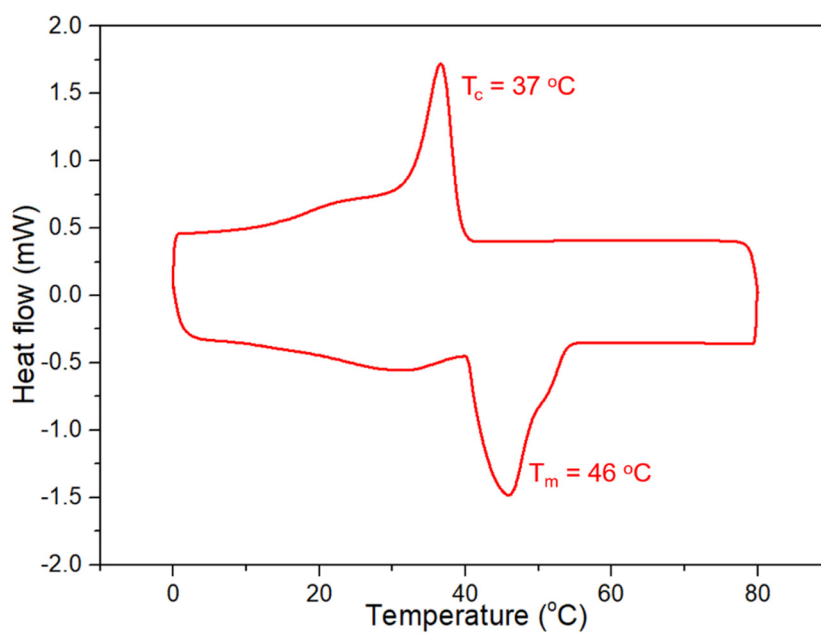

**Figure S21.** DSC trace of polymer obtained in Table 1, Entry 10.

## 4. Copies of SEC Charts

### GPC TEST REPORT

#### Header

|               |             |                                |                     |
|---------------|-------------|--------------------------------|---------------------|
| Title         |             | Data acquisition date and time | 2022/08/17 15:16:20 |
| Sample name   | ZFL-1-53-1  | Calculation date and time      | 2022/08/17 20:13:27 |
| Database name | 22-0817.chd | Acquisition time [min]         | 0.000 - 28.000      |
| Data name     | RSLT0007    | Sampling interval [msec]       | 100                 |
| Method name   | PS-20220628 | Cup number                     | 7                   |
| Channel       | RI          | Calculation type               | Molecular Weight    |

[mV]

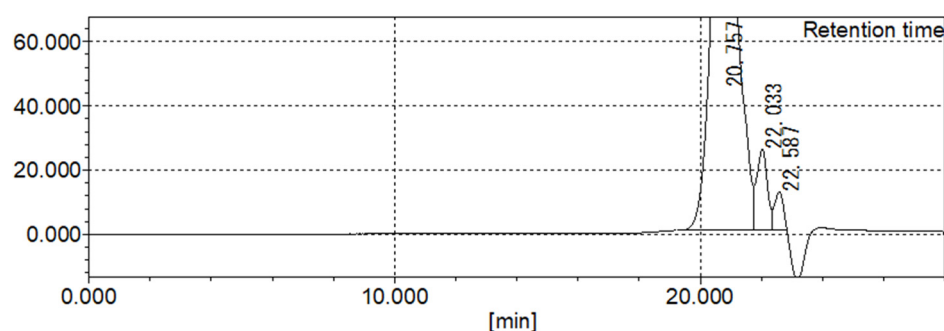

#### Result of molecular weight calculation (RI)

Peak 1 Base Peak

|               | [min]  | [mV]    | [mol]      | Mn      | 790   |
|---------------|--------|---------|------------|---------|-------|
| Peak start    | 19.507 | 1.513   | 5.626      | Mw      | 1,095 |
| Peak top      | 20.757 | 176.375 | 1,029      | Mz      | 1,429 |
| Peak end      | 21.750 | 15.110  | 180        | Mz+1    | 1,794 |
|               |        |         |            | Mv      | 1,095 |
| Height [mV]   |        |         | 174.889    | MP      | 1,057 |
| Area [mV*sec] |        |         | 8530.908   | Mz/Mw   | 1.305 |
| Height% [%]   |        |         | 82.553     | Mw/Mn   | 1.386 |
| [eta]         |        |         | 1095.20093 | Mz+1/Mw | 1.638 |

**Figure S22.** SEC chart of the homopolymer of diallyl disulfide ( $M_n = 790 \text{ g}\cdot\text{mol}^{-1}$ ,  $M_w/M_n = 1.39$ )

|               |                         |                                |                     |
|---------------|-------------------------|--------------------------------|---------------------|
| Header        |                         |                                |                     |
| Title         |                         | Data acquisition date and time | 2023/03/14 21:03:17 |
| Sample name   | GRH-YP202312717-XY-69-1 | Calculation date and time      | 2023/03/23 10:22:28 |
| Database name | 2023-03-14.chd          | Acquisition time [min]         | 0.000 - 20.000      |
| Data name     | RSLT4535                | Sampling interval [msec]       | 100                 |
| Method name   | PS-20230320             | Cup number                     | 9                   |
| Channel       | RI                      | Calculation type               | Molecular Weight    |

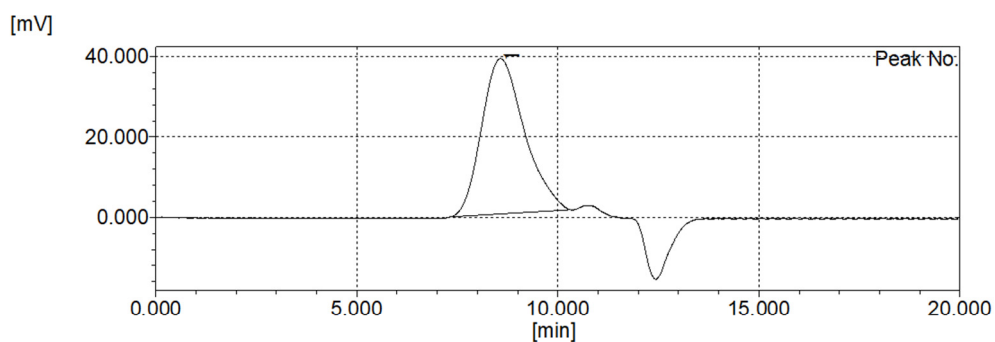

#### Result of molecular weight calculation (RI)

|                  |        |        |             |         |        |
|------------------|--------|--------|-------------|---------|--------|
| Peak 1 Base Peak |        |        |             |         |        |
|                  | [min]  | [mV]   | [mol]       | Mn      | 7,947  |
| Peak start       | 7.312  | 0.094  | 95,185      | Mw      | 14,513 |
| Peak top         | 8.572  | 39.603 | 13,343      | Mz      | 22,677 |
| Peak end         | 10.305 | 1.887  | 894         | Mz+1    | 31,364 |
|                  |        |        |             | Mv      | 14,513 |
| Height [mV]      |        |        | 38.754      | Mp      | 13,344 |
| Area [mV*sec]    |        |        | 2857.613    | Mz/Mw   | 1.563  |
| Area% [%]        |        |        | 100.000     | Mw/Mn   | 1.826  |
| [eta]            |        |        | 14512.61128 | Mz+1/Mw | 2.161  |

**Figure S23.** SEC chart of the polymer obtained in Table 1, entry 1. ( $M_n = 7.9 \text{ kg} \cdot \text{mol}^{-1}$ ,  $M_w/M_n = 1.83$ )

| Header        |                         |                                |                     |
|---------------|-------------------------|--------------------------------|---------------------|
| Title         |                         | Data acquisition date and time | 2023/03/14 21:23:19 |
| Sample name   | GRH-YP202312717-XY-69-2 | Calculation date and time      | 2023/03/23 10:22:57 |
| Database name | 2023-03-14.chd          | Acquisition time [min]         | 0.000 - 20.000      |
| Data name     | RSLT4536                | Sampling interval [msec]       | 100                 |
| Method name   | PS-20230320             | Cup number                     | 10                  |
| Channel       | RI                      | Calculation type               | Molecular Weight    |

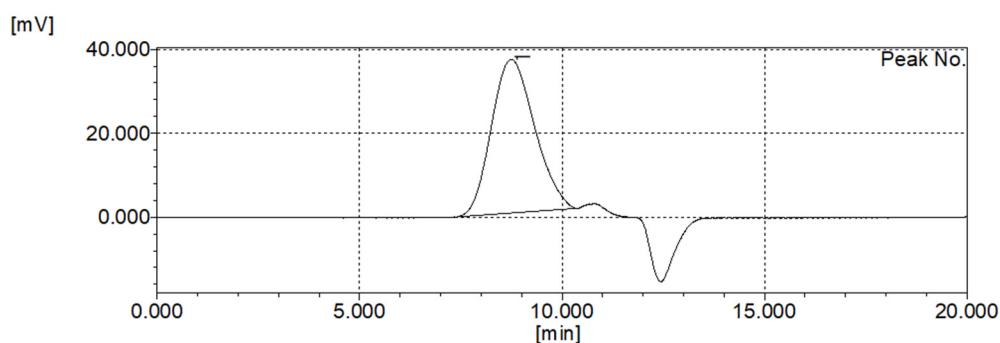

#### Result of molecular weight calculation (RI)

| Peak 1 Base Peak |        |        |             |         |        |
|------------------|--------|--------|-------------|---------|--------|
|                  | [min]  | [mV]   | [mol]       |         |        |
| Peak start       | 7.417  | 0.090  | 80,809      | Mn      | 6,634  |
| Peak top         | 8.747  | 37.691 | 10,157      | Mw      | 11,624 |
| Peak end         | 10.332 | 2.093  | 857         | Mz      | 18,235 |
|                  |        |        |             | Mz+1    | 25,610 |
|                  |        |        |             | Mv      | 11,624 |
| Height [mV]      |        |        | 36.687      | Mp      | 10,157 |
| Area [mV*sec]    |        |        | 2713.487    | Mz/Mw   | 1.569  |
| Area% [%]        |        |        | 100.000     | Mw/Mn   | 1.752  |
| [eta]            |        |        | 11624.41022 | Mz+1/Mw | 2.203  |

**Figure S24.** SEC chart of the polymer obtained in Table 1, entry 2. ( $M_n = 6.6 \text{ kg} \cdot \text{mol}^{-1}$ ,  $M_w/M_n = 1.75$ )

|               |                         |                                |                     |  |
|---------------|-------------------------|--------------------------------|---------------------|--|
| Header        |                         |                                |                     |  |
| Title         |                         | Data acquisition date and time | 2023/03/14 21:43:20 |  |
| Sample name   | GRH-YP202312717-XY-70-1 | Calculation date and time      | 2023/03/23 10:23:23 |  |
| Database name | 2023-03-14.chd          | Acquisition time [min]         | 0.000 - 20.000      |  |
| Data name     | RSLT4537                | Sampling interval [msec]       | 100                 |  |
| Method name   | PS-20230320             | Cup number                     | 11                  |  |
| Channel       | RI                      | Calculation type               | Molecular Weight    |  |

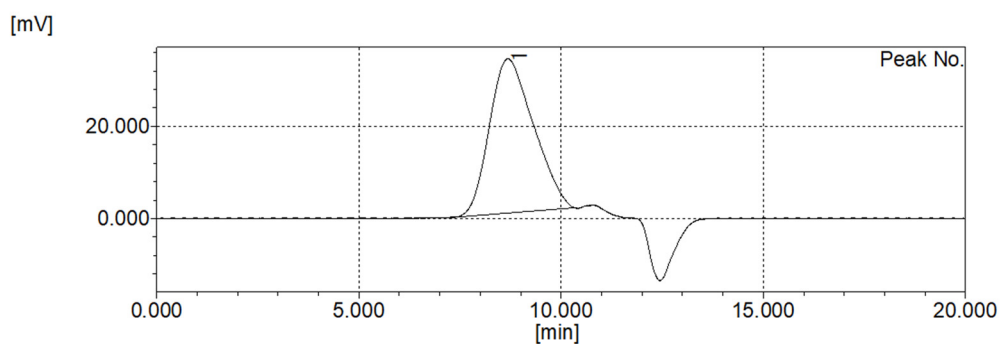

#### Result of molecular weight calculation (RI)

Peak 1 Base Peak

|               | [min]  | [mV]   | [mol]       |         |        |
|---------------|--------|--------|-------------|---------|--------|
| Peak start    | 7.440  | 0.359  | 77,922      | Mn      | 6,536  |
| Peak top      | 8.692  | 34.691 | 11,066      | Mw      | 11,790 |
| Peak end      | 10.313 | 2.374  | 882         | Mz      | 18,593 |
|               |        |        |             | Mz+1    | 25,906 |
|               |        |        |             | Mv      | 11,790 |
| Height [mV]   |        |        | 33.454      | Mp      | 11,067 |
| Area [mV*sec] |        |        | 2532.876    | Mz/Mw   | 1.577  |
| Area% [%]     |        |        | 100.000     | Mw/Mn   | 1.804  |
| [eta]         |        |        | 11790.45198 | Mz+1/Mw | 2.197  |

**Figure S25.** SEC chart of the polymer obtained in Table 1, entry 3. ( $M_n = 6.5 \text{ kg} \cdot \text{mol}^{-1}$ ,  $M_w/M_n = 1.80$ )



## Header

|               |                         |                                |                     |
|---------------|-------------------------|--------------------------------|---------------------|
| Title         |                         | Data acquisition date and time | 2023/03/14 22:03:21 |
| Sample name   | GRH-YP202312717-XY-71-1 | Calculation date and time      | 2023/03/23 10:23:50 |
| Database name | 2023-03-14.chd          | Acquisition time [min]         | 0.000 - 20.000      |
| Data name     | RSLT4538                | Sampling interval [msec]       | 100                 |
| Method name   | PS-20230320             | Cup number                     | 12                  |
| Channel       | RI                      | Calculation type               | Molecular Weight    |

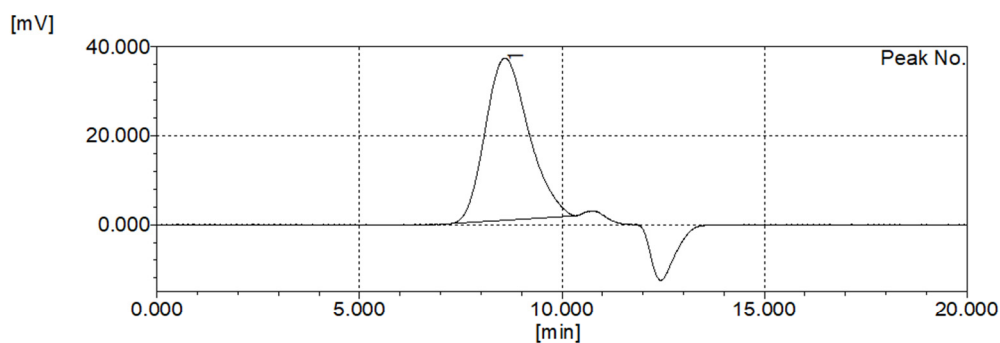

## Result of molecular weight calculation (RI)

Peak 1 Base Peak

|               | [min]  | [mV]   | [mol]       | Mn      | 7,973  |
|---------------|--------|--------|-------------|---------|--------|
| Peak start    | 7.232  | 0.229  | 107,832     | Mw      | 14,514 |
| Peak top      | 8.577  | 37.513 | 13,240      | Mz      | 22,955 |
| Peak end      | 10.383 | 2.020  | 791         | Mz+1    | 32,268 |
|               |        |        |             | Mv      | 14,514 |
| Height [mV]   |        |        | 36.520      | Mp      | 13,240 |
| Area [mV*sec] |        |        | 2721.306    | Mz/Mw   | 1.582  |
| Area% [%]     |        |        | 100.000     | Mw/Mn   | 1.820  |
| [eta]         |        |        | 14514.40895 | Mz+1/Mw | 2.223  |

**Figure S26.** SEC chart of the polymer obtained in Table 1, entry 4. ( $M_n = 8.0 \text{ kg} \cdot \text{mol}^{-1}$ ,  $M_w/M_n = 1.82$ )

|               |                         |                                |                     |
|---------------|-------------------------|--------------------------------|---------------------|
| Header        |                         |                                |                     |
| Title         |                         | Data acquisition date and time | 2023/03/14 22:23:23 |
| Sample name   | GRH-YP202312717-XY-71-2 | Calculation date and time      | 2023/03/23 10:24:17 |
| Database name | 2023-03-14.chd          | Acquisition time [min]         | 0.000 - 20.000      |
| Data name     | RSLT4539                | Sampling interval [msec]       | 100                 |
| Method name   | PS-20230320             | Cup number                     | 13                  |
| Channel       | RI                      | Calculation type               | Molecular Weight    |

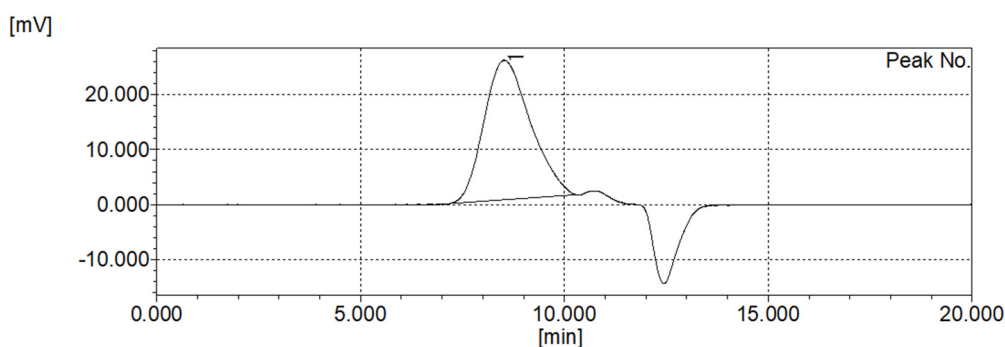

#### Result of molecular weight calculation (RI)

Peak 1 Base Peak

|               | [min]  | [mV]   | [mol]       | Mn      | 8,251  |
|---------------|--------|--------|-------------|---------|--------|
| Peak start    | 7.117  | 0.178  | 129,011     | Mw      | 15,914 |
| Peak top      | 8.523  | 26.312 | 14,388      | Mz      | 26,097 |
| Peak end      | 10.302 | 1.824  | 898         | Mz+1    | 37,290 |
|               |        |        |             | Mv      | 15,914 |
| Height [mV]   |        |        | 25.407      | Mp      | 14,388 |
| Area [mV*sec] |        |        | 2008.475    | Mz/Mw   | 1.640  |
| Area% [%]     |        |        | 100.000     | Mw/Mn   | 1.929  |
| [eta]         |        |        | 15913.59598 | Mz+1/Mw | 2.343  |

**Figure S27.** SEC chart of the polymer obtained in Table 1, entry 5. ( $M_n = 8.3 \text{ kg} \cdot \text{mol}^{-1}$ ,  $M_w/M_n = 1.93$ )

## Header

|               |                         |                                |                     |
|---------------|-------------------------|--------------------------------|---------------------|
| Title         |                         | Data acquisition date and time | 2023/03/14 22:43:24 |
| Sample name   | GRH-YP202312717-XY-72-1 | Calculation date and time      | 2023/03/23 10:24:43 |
| Database name | 2023-03-14.chd          | Acquisition time [min]         | 0.000 - 20.000      |
| Data name     | RSLT4540                | Sampling interval [msec]       | 100                 |
| Method name   | PS-20230320             | Cup number                     | 14                  |
| Channel       | RI                      | Calculation type               | Molecular Weight    |

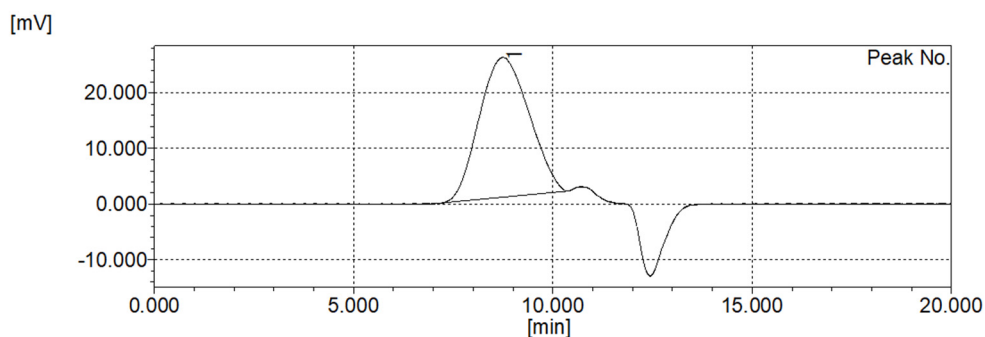

## Result of molecular weight calculation (RI)

|                  |        |        |             |         |        |
|------------------|--------|--------|-------------|---------|--------|
| Peak 1 Base Peak |        |        |             |         |        |
|                  | [min]  | [mV]   | [mol]       | Mn      | 6,496  |
| Peak start       | 7.205  | 0.242  | 112,410     | Mw      | 13,040 |
| Peak top         | 8.738  | 26.441 | 10,289      | Mz      | 23,004 |
| Peak end         | 10.358 | 2.362  | 822         | Mz+1    | 34,186 |
|                  |        |        |             | Mv      | 13,040 |
| Height [mV]      |        |        | 25.168      | Mp      | 10,290 |
| Area [mV*sec]    |        |        | 2179.761    | Mz/Mw   | 1.764  |
| Area% [%]        |        |        | 100.000     | Mw/Mn   | 2.007  |
| [eta]            |        |        | 13040.17051 | Mz+1/Mw | 2.622  |

**Figure S28.** SEC chart of the polymer obtained in Table 1, entry 6. ( $M_n = 6.5 \text{ kg} \cdot \text{mol}^{-1}$ ,  $M_w/M_n = 2.00$ )

## Header

Title  
Sample name ZXH-YP202315344-xy-79-1  
Database name 2023-03-22.chd  
Data name RSLT4603  
Method name PS-20230320  
Channel RI

Data acquisition date and time 2023/03/22 23:25:00  
Calculation date and time 2023/03/23 10:04:27  
Acquisition time [min] 0.000 - 20.000  
Sampling interval [msec] 100  
Cup number 15  
Calculation type Molecular Weight

[mV]

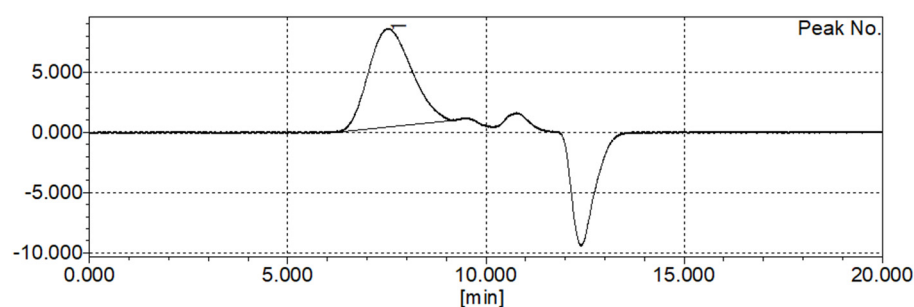

## Result of molecular weight calculation (RI)

Peak 1 Base Peak

|               | [min] | [mV]   | [mol]       |         |         |
|---------------|-------|--------|-------------|---------|---------|
| Peak start    | 6.172 | -0.006 | 563,115     | Mn      | 42,831  |
| Peak top      | 7.522 | 8.668  | 68,605      | Mw      | 76,566  |
| Peak end      | 9.165 | 0.985  | 5,290       | Mz      | 121,269 |
|               |       |        |             | Mz+1    | 171,765 |
|               |       |        |             | Mv      | 76,566  |
| Height [mV]   |       |        | 8.227       | Mp      | 68,605  |
| Area [mV*sec] |       |        | 619.195     | Mz/Mw   | 1.584   |
| Area% [%]     |       |        | 100.000     | Mw/Mn   | 1.788   |
| [eta]         |       |        | 76566.14692 | Mz+1/Mw | 2.243   |

**Figure S29.** SEC chart of the polymer obtained in Table 1, entry 7. ( $M_n = 42.8 \text{ kg} \cdot \text{mol}^{-1}$ ,  $M_w/M_n = 1.79$ )

## Header

|               |                         |                                |                     |
|---------------|-------------------------|--------------------------------|---------------------|
| Title         |                         | Data acquisition date and time | 2023/03/23 00:45:06 |
| Sample name   | ZXH-YP202315344-xy-74-2 | Calculation date and time      | 2023/03/23 10:09:53 |
| Database name | 2023-03-22.chd          | Acquisition time [min]         | 0.000 - 20.000      |
| Data name     | RSLT4607                | Sampling interval [msec]       | 100                 |
| Method name   | PS-20230320             | Cup number                     | 19                  |
| Channel       | RI                      | Calculation type               | Molecular Weight    |

[mV]

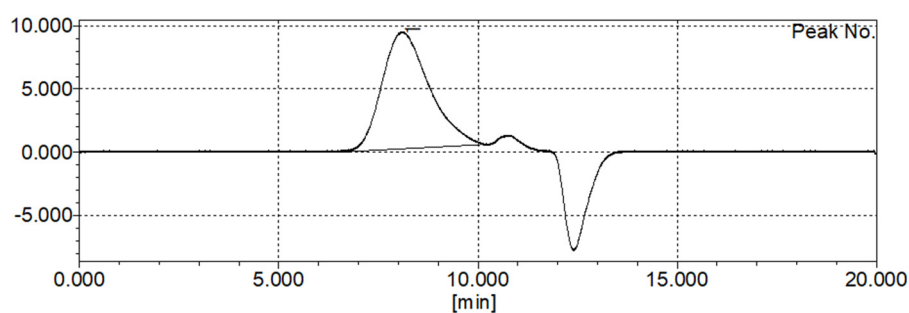

## Result of molecular weight calculation (RI)

Peak 1 Base Peak

|               | [min]  | [mV]  | [mol]       | Mn      |        |
|---------------|--------|-------|-------------|---------|--------|
| Peak start    | 6.597  | 0.024 | 290,255     | Mw      | 13,907 |
| Peak top      | 8.097  | 9.561 | 27,987      | Mz      | 30,923 |
| Peak end      | 10.225 | 0.623 | 1,013       | Mz+1    | 54,687 |
|               |        |       |             | Mv      | 85,164 |
| Height [mV]   |        |       | 9.289       | Mp      | 30,923 |
| Area [mV*sec] |        |       | 764.519     | Mz/Mw   | 27,987 |
| Area% [%]     |        |       | 100.000     | Mw/Mn   | 1.769  |
| [eta]         |        |       | 30922.87134 | Mz+1/Mw | 2.224  |
|               |        |       |             |         | 2.754  |

**Figure S30.** SEC chart of the polymer obtained in Table 1, entry 8. ( $M_n = 13.9 \text{ kg} \cdot \text{mol}^{-1}$ ,  $M_w/M_n = 2.22$ ).

| Header        |                         |                                |                     |
|---------------|-------------------------|--------------------------------|---------------------|
| Title         |                         | Data acquisition date and time | 2023/03/23 01:25:08 |
| Sample name   | ZXH-YP202315344-xy-75-1 | Calculation date and time      | 2023/03/23 10:12:21 |
| Database name | 2023-03-22.chd          | Acquisition time [min]         | 0.000 - 20.000      |
| Data name     | RSLT4609                | Sampling interval [msec]       | 100                 |
| Method name   | PS-20230320             | Cup number                     | 21                  |
| Channel       | RI                      | Calculation type               | Molecular Weight    |

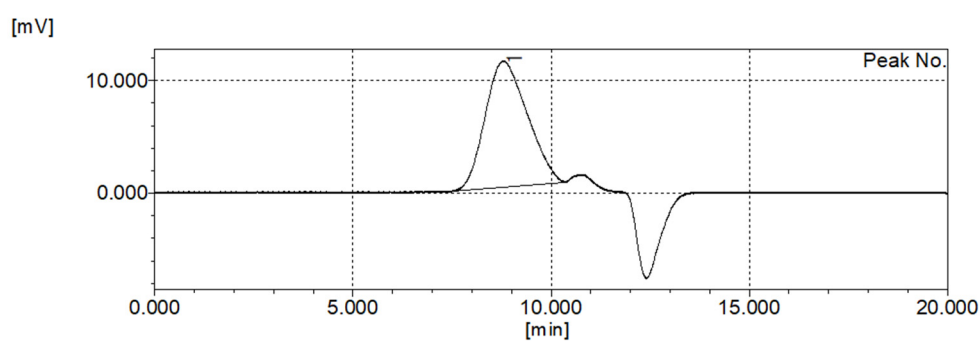

#### Result of molecular weight calculation (RI)

Peak 1 Base Peak

|               | [min]  | [mV]   | [mol]       |         |        |
|---------------|--------|--------|-------------|---------|--------|
| Peak start    | 7.353  | 0.140  | 89,197      | Mn      | 5,883  |
| Peak top      | 8.797  | 11.790 | 9,395       | Mw      | 10,239 |
| Peak end      | 10.320 | 0.958  | 873         | Mz      | 16,155 |
|               |        |        |             | Mz+1    | 23,323 |
|               |        |        |             | Mv      | 10,239 |
| Height [mV]   |        |        | 11.252      | Mp      | 9,395  |
| Area [mV*sec] |        |        | 828.429     | Mz/Mw   | 1.578  |
| Area% [%]     |        |        | 100.000     | Mw/Mn   | 1.740  |
| [eta]         |        |        | 10239.01058 | Mz+1/Mw | 2.278  |

**Figure S31.** SEC chart of the polymer obtained in Table 1, entry 9. ( $M_n = 5.9 \text{ kg} \cdot \text{mol}^{-1}$ ,  $M_w/M_n = 1.74$ )

| Header        |                         |                                |                     |
|---------------|-------------------------|--------------------------------|---------------------|
| Title         |                         | Data acquisition date and time | 2023/03/23 00:05:03 |
| Sample name   | ZXH-YP202315344-xy-75-2 | Calculation date and time      | 2023/03/23 10:07:41 |
| Database name | 2023-03-22.chd          | Acquisition time [min]         | 0.000 - 20.000      |
| Data name     | RSLT4605                | Sampling interval [msec]       | 100                 |
| Method name   | PS-20230320             | Cup number                     | 17                  |
| Channel       | RI                      | Calculation type               | Molecular Weight    |

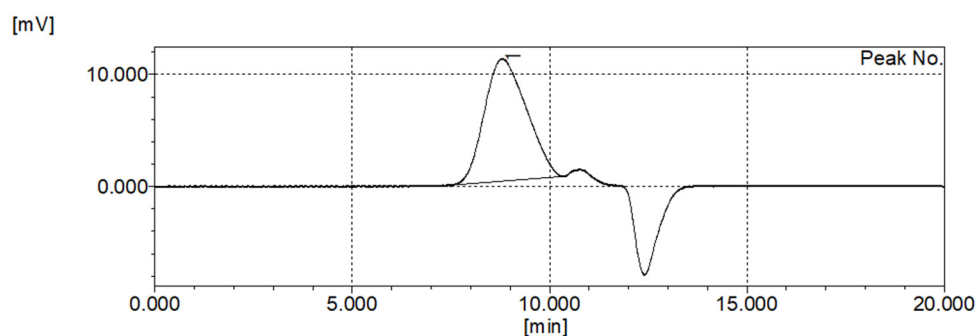

#### Result of molecular weight calculation (RI)

|                  |        |        |            |         |        |
|------------------|--------|--------|------------|---------|--------|
| Peak 1 Base Peak |        |        |            |         |        |
|                  | [min]  | [mV]   | [mol]      | Mn      | 5,820  |
| Peak start       | 7.390  | 0.097  | 84,240     | Mw      | 9,997  |
| Peak top         | 8.802  | 11.468 | 9,322      | Mz      | 15,650 |
| Peak end         | 10.358 | 0.913  | 822        | Mz+1    | 22,408 |
|                  |        |        |            | Mv      | 9,997  |
| Height [mV]      |        |        | 10.983     | Mp      | 9,322  |
| Area [mV*sec]    |        |        | 810.008    | Mz/Mw   | 1.566  |
| Area% [%]        |        |        | 100.000    | Mw/Mn   | 1.718  |
| [eta]            |        |        | 9996.70852 | Mz+1/Mw | 2.242  |

**Figure S32.** SEC chart of the polymer obtained in Table 1, entry 10. ( $M_n = 5.8 \text{ kg} \cdot \text{mol}^{-1}$ ,  $M_w/M_n = 1.72$ )

## Header

Title  
Sample name ZXH-YP202315344-xy-80-2  
Database name 2023-03-22.chd  
Data name RSLT4604  
Method name PS-20230320  
Channel RI

Data acquisition date and time 2023/03/22 23:45:02  
Calculation date and time 2023/03/23 10:06:48  
Acquisition time [min] 0.000 - 20.000  
Sampling interval [msec] 100  
Cup number 16  
Calculation type Molecular Weight

[mV]

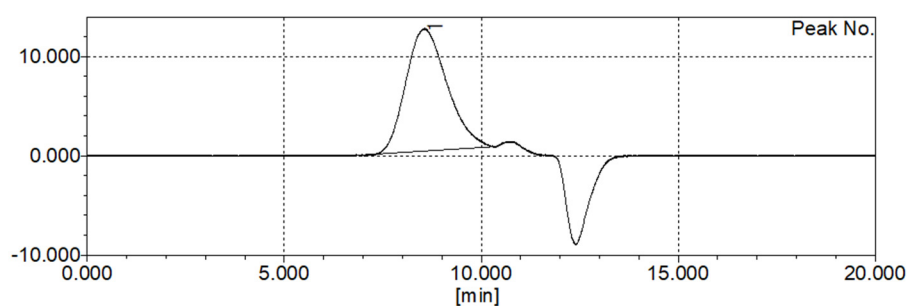

## Result of molecular weight calculation (RI)

Peak 1 Base Peak

|               | [min]  | [mV]   | [mol]       | Mn      | 8,536  |
|---------------|--------|--------|-------------|---------|--------|
| Peak start    | 7.100  | 0.109  | 132,408     | Mw      | 15,213 |
| Peak top      | 8.545  | 12.825 | 13,910      | Mz      | 23,837 |
| Peak end      | 10.252 | 0.891  | 971         | Mz+1    | 34,288 |
|               |        |        |             | Mv      | 15,213 |
| Height [mV]   |        |        | 12.357      | Mp      | 13,910 |
| Area [mV*sec] |        |        | 896.117     | Mz/Mw   | 1.567  |
| Area% [%]     |        |        | 100.000     | Mw/Mn   | 1.782  |
| [eta]         |        |        | 15212.56104 | Mz+1/Mw | 2.254  |

**Figure S33.** SEC chart of the polymer obtained in Table 1, entry 11. ( $M_n = 8.5 \text{ kg} \cdot \text{mol}^{-1}$ ,  $M_w/M_n = 1.78$ )



## Header

|               |                         |                                |                     |
|---------------|-------------------------|--------------------------------|---------------------|
| Title         |                         | Data acquisition date and time | 2023/03/23 01:05:06 |
| Sample name   | ZXH-YP202315344-xy-76-1 | Calculation date and time      | 2023/03/23 10:11:17 |
| Database name | 2023-03-22.chd          | Acquisition time [min]         | 0.000 - 20.000      |
| Data name     | RSLT4608                | Sampling interval [msec]       | 100                 |
| Method name   | PS-20230320             | Cup number                     | 20                  |
| Channel       | RI                      | Calculation type               | Molecular Weight    |

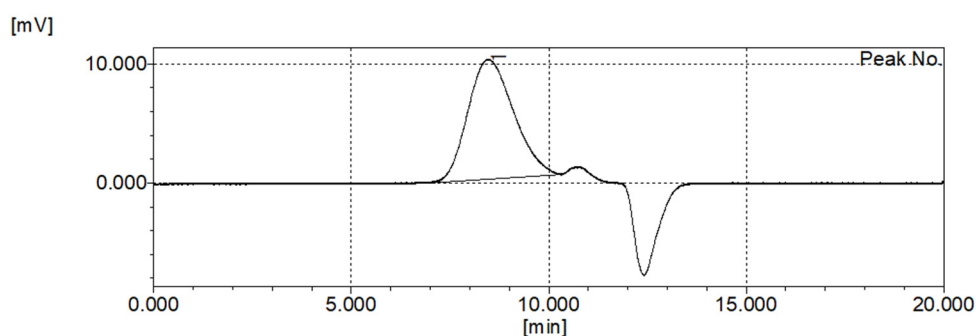

## Result of molecular weight calculation (RI)

Peak 1 Base Peak

|               | [min]  | [mV]   | [mol]       | Mn      | 9,135  |
|---------------|--------|--------|-------------|---------|--------|
| Peak start    | 6.872  | -0.015 | 189,036     | Mw      | 18,145 |
| Peak top      | 8.457  | 10.439 | 15,964      | Mz      | 31,371 |
| Peak end      | 10.375 | 0.734  | 801         | Mz+1    | 49,274 |
|               |        |        |             | Mv      | 18,145 |
| Height [mV]   |        |        | 10.115      | Mp      | 15,965 |
| Area [mV*sec] |        |        | 812.125     | Mz/Mw   | 1.729  |
| Area% [%]     |        |        | 100.000     | Mw/Mn   | 1.986  |
| [eta]         |        |        | 18144.98930 | Mz+1/Mw | 2.716  |

**Figure S34.** SEC chart of the polymer obtained in Table 1, entry 12. ( $M_n = 9.1 \text{ kg} \cdot \text{mol}^{-1}$ ,  $M_w/M_n = 1.99$ )

|               |                     |                                |                     |
|---------------|---------------------|--------------------------------|---------------------|
| Header        |                     |                                |                     |
| Title         |                     | Data acquisition date and time | 2023/04/19 16:53:10 |
| Sample name   | XY-YP202322263-85-1 | Calculation date and time      | 2023/04/19 19:18:02 |
| Database name | 2023-04-19.chd      | Acquisition time [min]         | 0.000 - 20.000      |
| Data name     | RSLT4790            | Sampling interval [msec]       | 100                 |
| Method name   | PS-20230320         | Cup number                     | 6                   |
| Channel       | RI                  | Calculation type               | Molecular Weight    |

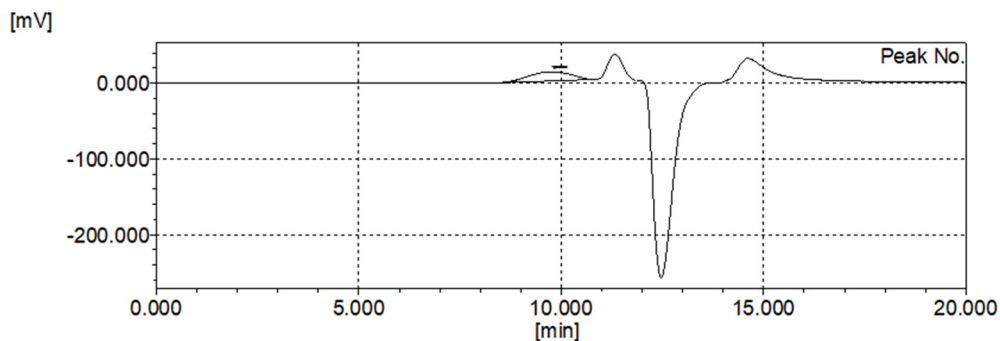

Result of molecular weight calculation (RI)

|                  |        |        |            |         |       |
|------------------|--------|--------|------------|---------|-------|
| Peak 1 Base Peak |        |        |            |         |       |
|                  | [min]  | [mV]   | [mol]      | Mn      | 1,830 |
| Peak start       | 8.382  | 0.279  | 17.945     | Mw      | 2,904 |
| Peak top         | 9.700  | 14.990 | 2.296      | Mz      | 4,475 |
| Peak end         | 10.825 | 4.875  | 397        | Mz+1    | 6,271 |
|                  |        |        |            | Mv      | 2,904 |
| Height [mV]      |        |        | 12.231     | Mp      | 2,297 |
| Area [mV*sec]    |        |        | 889.844    | Mz/Mw   | 1.541 |
| Area% [%]        |        |        | 100.000    | Mw/Mn   | 1.587 |
| [eta]            |        |        | 2903.60267 | Mz+1/Mw | 2.160 |

**Figure S35.** SEC chart of the polymer obtained in Table 1, entry 10 after treatment of tri-*n*-butylphosphine. ( $M_n = 1.8 \text{ kg} \cdot \text{mol}^{-1}$ ,  $M_w/M_n = 1.59$ )
